# Supplementary material for: PFDN2 promotes cell cycle progression via the hnRNPD-MYBL2 axis in gastric cancer
Source: Front Oncol. 2023 Jul 18;13:1164070. doi: 10.3389/fonc.2023.1164070 (PMC10395514; doi:10.3389/fonc.2023.1164070)
Supplement: Supplementary file 1 [file Table_1.xlsx]

## Sheet: supplemental data1
Supplemental data 1: Differentially expressed genes following PFDN2 depletion
Gene Symbol	Type	Qvalue (PFDN2_SI / NC)	PFDN2_SI1 TPM	PFDN2_SI2 TPM	nc_1 TPM	nc_2 TPM	NC Average TPM	PFDN2_SI Average TPM
'PFDN2'	mRNA	1.24e-89	41.78	41.48	269.03	266.1	267.565	41.63	0.155588
'MYBL2'	mRNA	6.63e-161	37.53	37.02	166.84	162.24	164.54	37.275	0.226541
'RCN2'	mRNA	3.19e-28	6.23	5.23	22.61	26.68	24.645	5.73	0.232502
'LMAN2'	mRNA	3.21e-188	72.69	71.75	277.26	264.57	270.915	72.22	0.266578
'GALNT1'	mRNA	8.44e-103	18.96	18.6	61.93	69.88	65.905	18.78	0.284956
'TXNDC12'	mRNA	2.18e-58	33.27	33.43	100.5	112.01	106.255	33.35	0.313868
'TPM3'	mRNA	6.18e-261	146.91	148.17	419.68	436.45	428.065	147.54	0.344667
'PSAT1'	mRNA	4.56e-61	27.72	32.46	82.39	87.08	84.735	30.09	0.355107
'UMAD1'	mRNA	5.73e-12	6.74	6.9	15.18	18.87	17.025	6.82	0.400587
'BIRC5'	mRNA	2e-53	25.69	26.83	65.2	64.6	64.9	26.26	0.404622
'ATP6V1H'	mRNA	1.02e-20	14.05	13.13	32.75	31.65	32.2	13.59	0.42205
'C9orf64'	mRNA	2.9e-14	8.72	7.6	19.35	18.31	18.83	8.16	0.433351
'ENAH'	mRNA	5.87e-57	11.35	11.61	25.48	27.36	26.42	11.48	0.434519
'CCL5'	mRNA	2.74e-05	7.57	7.6	18.52	15.27	16.895	7.585	0.448949
'EMC4'	mRNA	5.25e-42	104.32	97.3	218.96	224.42	221.69	100.81	0.454734
'WSB2'	mRNA	4.5e-54	47.79	46.29	98	105.03	101.515	47.04	0.46338
'SYNC'	mRNA	5.3e-20	11.35	10.46	22.57	23.86	23.215	10.905	0.469739
'SLC12A3'	mRNA	5.27e-29	10.65	10.41	21.08	22.83	21.955	10.53	0.479617
'TRNP1'	mRNA	0.000430758	5.14	3.51	8.38	9.65	9.015	4.325	0.479756
'CFL1'	mRNA	1.58e-185	1142.38	1160.43	2359.84	2378.85	2369.34	1151.4	0.485959
'NCKAP1'	mRNA	2.58e-61	34.48	35.53	69.61	72.47	71.04	35.005	0.492751
'ANLN'	mRNA	6.4e-92	66.44	68.22	133.45	139.64	136.545	67.33	0.493098
'EBAG9'	mRNA	6.87e-06	7.06	5.82	13.14	12.65	12.895	6.44	0.499418
'STRBP'	mRNA	1.36e-11	8.36	8.7	16.09	17.85	16.97	8.53	0.502652
'ZFPL1'	mRNA	2.34e-13	23.96	26.05	48.04	50.55	49.295	25.005	0.507252
'HMOX1'	mRNA	5.54e-26	45.43	45.04	89.16	87.68	88.42	45.235	0.511592
'ZMYND11'	mRNA	6.38e-14	7.23	7.83	13.92	15.5	14.71	7.53	0.511897
'AP2B1'	mRNA	1.9e-63	35.88	37.21	70.15	72.28	71.215	36.545	0.513164
'HNRNPUL1'	mRNA	2.36e-66	53.2	56.49	108.89	104.78	106.835	54.845	0.513362
'BORA'	mRNA	2.74e-13	13.2	12.55	23.34	26.76	25.05	12.875	0.513972
'CKAP2L'	mRNA	1.16e-16	9.21	8.76	17.03	17.85	17.44	8.985	0.515195
'API5'	mRNA	2.2e-35	24.33	26.5	47.69	50.17	48.93	25.415	0.519415
'SLC20A1'	mRNA	2.53e-72	83.22	82.45	156.78	159.81	158.295	82.835	0.523295
'HNRNPUL2'	mRNA	8.71e-29	14.61	15.87	29.37	28.55	28.96	15.24	0.526243
'CCNYL1'	mRNA	1.42e-17	12.52	12.16	24.31	22.57	23.44	12.34	0.526451
'MAPKAP1'	mRNA	1.15e-38	40.81	44.47	77.28	72.89	75.085	42.64	0.56789
'CXCL8'	mRNA	3.32e-05	15.35	16.14	6.02	8.64	7.33	15.745	2.14802
'TMEM216'	mRNA	1.15e-05	29.29	29.57	13.53	13.82	13.675	29.43	2.1521
'MMP24'	mRNA	7.3e-10	11.35	10.91	5.13	5.2	5.165	11.13	2.15489
'IL6'	mRNA	2.57e-09	41.14	41.2	18.99	18.5	18.745	41.17	2.19632
'GANAB'	mRNA	9.23e-96	189.68	196.19	89.97	84.95	87.46	192.935	2.20598
'AREG'	mRNA	5.07e-06	24.11	25.31	10.31	11.62	10.965	24.71	2.25353
'RGS19'	mRNA	6.93e-13	43.47	43.76	19.8	18.47	19.135	43.615	2.27933
'OGFR'	mRNA	8.26e-34	69.65	76.78	31.77	32.25	32.01	73.215	2.28725
'TPM4'	mRNA	1.06e-173	736.73	730.13	305.62	297.75	301.685	733.43	2.43111
